# Supplementary material for: Physiological and Transcriptomic Analyses Reveal the Mechanisms of Compensatory Growth Ability for Early Rice after Low Temperature and Weak Light Stress
Source: MDPI journal article supplement (doi:10.3390/plants11192523), 2022-09-26
Supplement: s1 [file s1]

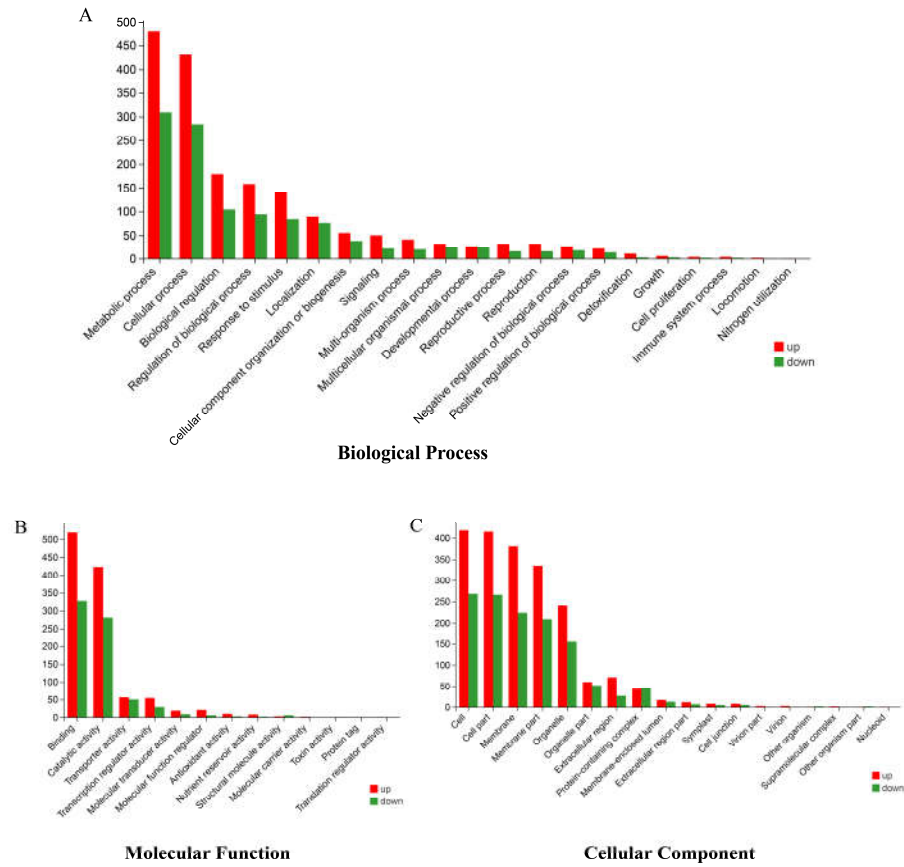

**Figure S1.** GO enrichment analysis of DEGs in the B144-CK vs B116-CK comparison group, where the X-axis represents different GO terms and the Y-axis represents the number of DEGs, was grouped by biological processes, cellular components and molecular functions based on rice GO annotation information. (A) Biological process, (B) Molecular function, (C) Cellular component.

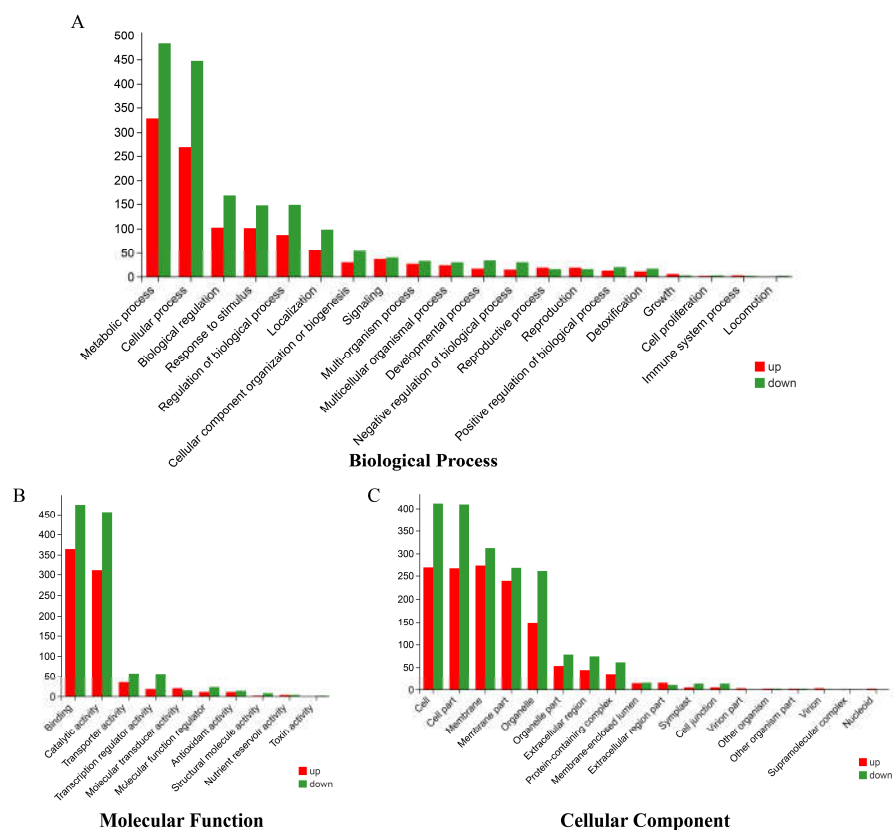

**Figure S2.** GO enrichment analysis of DEGs in the B144-T vs B116-T comparison group, where the X-axis represents different GO terms and the Y-axis represents the number of DEGs, was grouped by biological processes, cellular components and molecular functions based on rice GO annotation information. (A) Biological process, (B) Molecular function, (C) Cellular component.

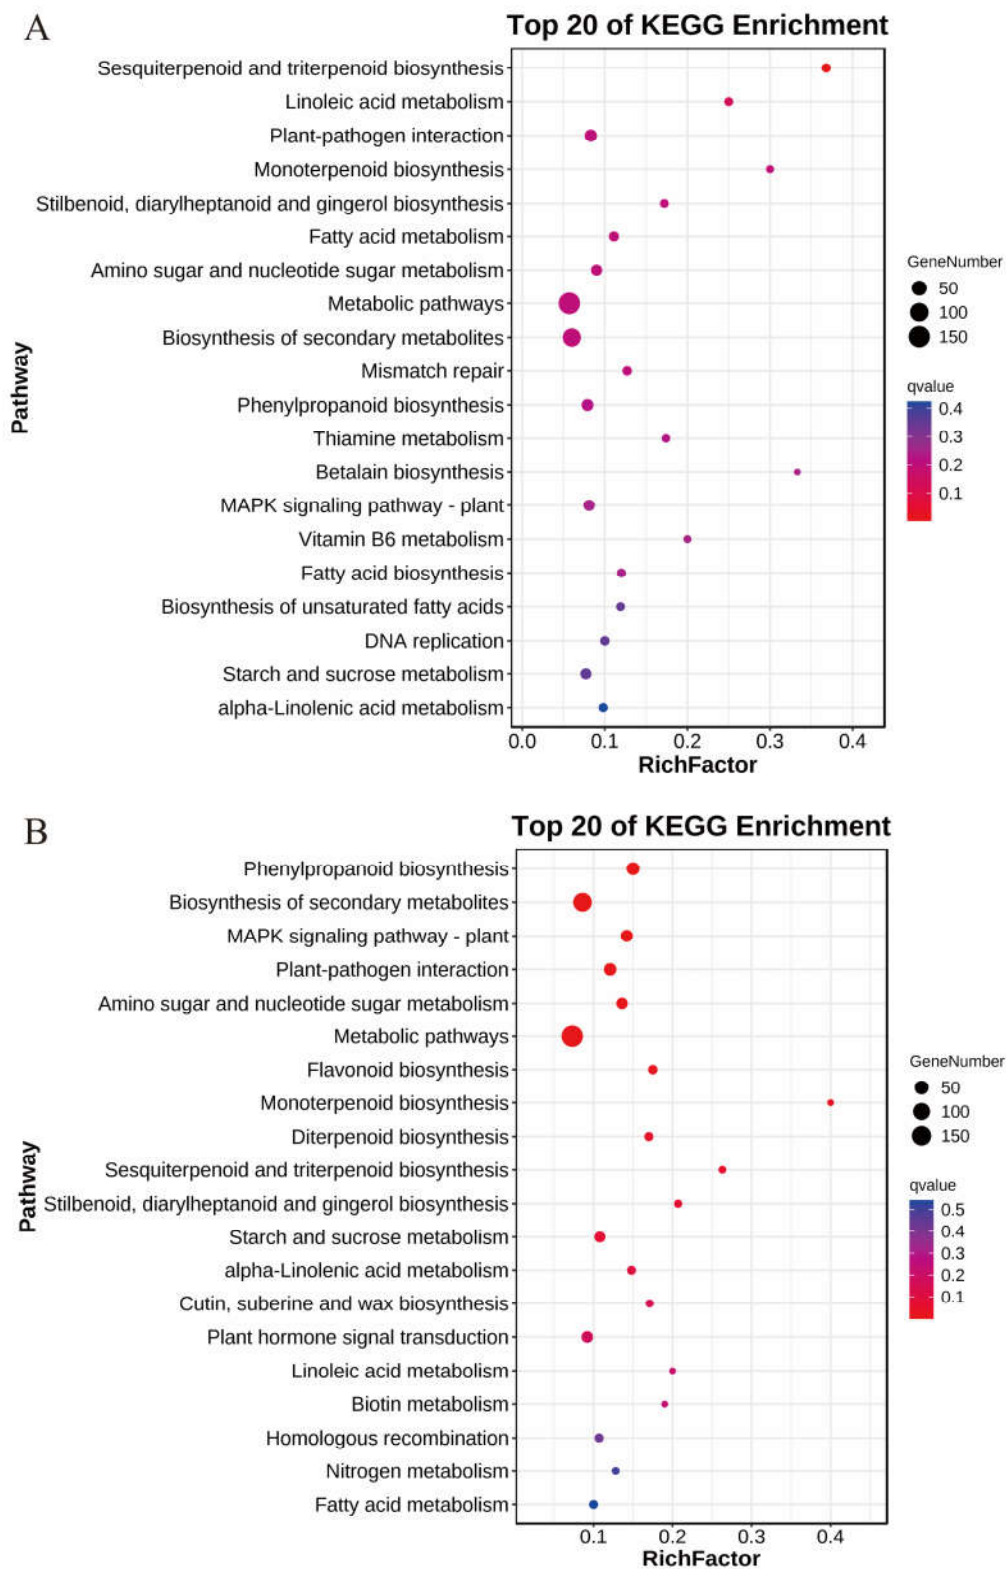

**Figure S3.** Top 20 of KEGG pathway enrichment analysis of the DEGs.(A),(B),represent B144-CK vs B116-CK and B144-T vs B116-T respectively. The X-axis indicates the rich

factor (Divide the number of differential genes in the pathway by all the numbers in the pathway) and the Y-axis indicates the KEGG pathway. Circle size indicates the number of DEGs in the pathway and the colors indicate Q value of DEGs.

**Table S1.** List of qRT-PCR primers used.

| Primer                | Sequence (5' to 3')       | Base number |
|-----------------------|---------------------------|-------------|
| <i>Os06g0521500-F</i> | CGTCAATGGTTGTGATGGCTCC    | 24          |
| <i>Os06g0521500-R</i> | GTAACGAAGCGCGAGTCCTT      | 22          |
| <i>Os01g0963000-F</i> | GAACACCAACGACACCACCGT     | 25          |
| <i>Os01g0963000-R</i> | GACGTACTGGTCGAAGAAGGCC    | 24          |
| <i>Os12g0111800-F</i> | CACTCTCAGGGGCTCACACC      | 23          |
| <i>Os12g0111800-R</i> | CACCCTTCTTGTTTCAGCAGGTTC  | 25          |
| <i>Os03g0235000-F</i> | GTCTTATCAGGGGCGCACAC      | 25          |
| <i>Os03g0235000-R</i> | TCGGCGGAGTTGACGTCCAG      | 19          |
| <i>Os10g0109600-F</i> | CGTCCTATCAGGAGGGCACAC     | 24          |
| <i>Os10g0109600-R</i> | GCGGAGGTGATGTCCAGCAC      | 23          |
| <i>Os08g0113000-F</i> | CGTCCTATCAGGAGGGCACAC     | 24          |
| <i>Os08g0113000-R</i> | CGTAGGCGGAGGTGATGTCCA     | 24          |
| <i>Os02g0630300-F</i> | CCTTTTTCAGGCGTGGAGCAAC    | 24          |
| <i>Os02g0630300-R</i> | CCTGCACCCTTCGCCTGTAC      | 24          |
| <i>Os05g0208550-F</i> | GGAGATGTCTTACAGCCAGGTGG   | 24          |
| <i>Os05g0208550-R</i> | TGTTGGAGGGGGTAGAAGGCCC    | 24          |
| <i>OsActin-F</i>      | GGCCAACAGGGAGAAGATGACAC   | 23          |
| <i>OsActin-R</i>      | GATCCCTACCAGCAAGATCAAGACG | 25          |

**Table S2.** The top 20 metabolic pathways in B116-CK vs B116-T comparable group.

| Top 20 metabolic pathway                              | Number of DEGs | Q_value  |
|-------------------------------------------------------|----------------|----------|
| MAPK signaling pathway - plant                        | 45             | 0        |
| Plant hormone signal transduction                     | 52             | 0        |
| Diterpenoid biosynthesis                              | 18             | 0        |
| Plant-pathogen interaction                            | 47             | 0        |
| Linoleic acid metabolism                              | 9              | 0.000043 |
| Biosynthesis of secondary metabolites                 | 140            | 0.000219 |
| Phenylpropanoid biosynthesis                          | 33             | 0.005342 |
| alpha-Linolenic acid metabolism                       | 12             | 0.007533 |
| Tryptophan metabolism                                 | 13             | 0.025788 |
| Flavonoid biosynthesis                                | 11             | 0.027755 |
| Benzoxazinoid biosynthesis                            | 2              | 0.116982 |
| Metabolic pathways                                    | 203            | 0.128875 |
| Monoterpenoid biosynthesis                            | 3              | 0.193994 |
| Cyanoamino acid metabolism                            | 9              | 0.220487 |
| Arginine and proline metabolism                       | 9              | 0.245645 |
| Stilbenoid, diarylheptanoid and gingerol biosynthesis | 5              | 0.245645 |
| Nitrogen metabolism                                   | 6              | 0.245645 |
| Glycerophospholipid metabolism                        | 14             | 0.245645 |
| Glycerolipid metabolism                               | 11             | 0.28108  |
| Betalain biosynthesis                                 | 2              | 0.28108  |

**Table S3.** The top 20 metabolic pathways in B144-T-vs-B116-T comparable group.

| Top 20 metabolic pathway                              | Number of DEGs | Q_value  |
|-------------------------------------------------------|----------------|----------|
| Phenylpropanoid biosynthesis                          | 40             | 0.000007 |
| Biosynthesis of secondary metabolites                 | 132            | 0.000162 |
| MAPK signaling pathway - plant                        | 30             | 0.000361 |
| Plant-pathogen interaction                            | 35             | 0.001823 |
| Amino sugar and nucleotide sugar metabolism           | 24             | 0.003678 |
| Metabolic pathways                                    | 198            | 0.00417  |
| Flavonoid biosynthesis                                | 11             | 0.020868 |
| Monoterpenoid biosynthesis                            | 4              | 0.02987  |
| Diterpenoid biosynthesis                              | 9              | 0.052578 |
| Sesquiterpenoid and triterpenoid biosynthesis         | 5              | 0.052578 |
| Stilbenoid, diarylheptanoid and gingerol biosynthesis | 6              | 0.069871 |
| Starch and sucrose metabolism                         | 21             | 0.069871 |
| alpha-Linolenic acid metabolism                       | 9              | 0.094355 |
| Cutin, suberine and wax biosynthesis                  | 6              | 0.142625 |
| Plant hormone signal transduction                     | 26             | 0.175656 |
| Linoleic acid metabolism                              | 4              | 0.212377 |
| Biotin metabolism                                     | 4              | 0.235401 |
| Homologous recombination                              | 9              | 0.428571 |
| Nitrogen metabolism                                   | 5              | 0.508869 |
| Fatty acid metabolism                                 | 9              | 0.541201 |

**Table S4.** The top 20 metabolic pathways in B144-CK-vs-B116-CK comparable group.

| Top 20 metabolic pathway                              | Number of DEGs | Q_value  |
|-------------------------------------------------------|----------------|----------|
| Sesquiterpenoid and triterpenoid biosynthesis         | 7              | 0.00232  |
| Linoleic acid metabolism                              | 5              | 0.134145 |
| Plant-pathogen interaction                            | 24             | 0.200238 |
| Monoterpenoid biosynthesis                            | 3              | 0.200238 |
| Stilbenoid, diarylheptanoid and gingerol biosynthesis | 5              | 0.200238 |
| Fatty acid metabolism                                 | 10             | 0.200238 |
| Amino sugar and nucleotide sugar metabolism           | 16             | 0.200238 |
| Metabolic pathways                                    | 154            | 0.200238 |
| Biosynthesis of secondary metabolites                 | 93             | 0.200238 |
| Mismatch repair                                       | 7              | 0.200238 |
| Phenylpropanoid biosynthesis                          | 21             | 0.227218 |
| Thiamine metabolism                                   | 4              | 0.227218 |
| Betalain biosynthesis                                 | 2              | 0.247306 |
| MAPK signaling pathway - plant                        | 17             | 0.247306 |
| Vitamin B6 metabolism                                 | 3              | 0.247306 |
| Fatty acid biosynthesis                               | 6              | 0.247306 |
| Biosynthesis of unsaturated fatty acids               | 5              | 0.350889 |
| DNA replication                                       | 7              | 0.350889 |
| Starch and sucrose metabolism                         | 15             | 0.351344 |
| alpha-Linolenic acid metabolism                       | 6              | 0.423398 |

**Table S5.** The top 20 metabolic pathways in B144-CK-vs-B144-T comparable group.

| Top 20 metabolic pathway                      | Number of DEGs | Q_value  |
|-----------------------------------------------|----------------|----------|
| Biosynthesis of secondary metabolites         | 134            | 0        |
| Phenylpropanoid biosynthesis                  | 41             | 0        |
| Diterpenoid biosynthesis                      | 18             | 0        |
| Metabolic pathways                            | 182            | 0        |
| Amino sugar and nucleotide sugar metabolism   | 24             | 0.000066 |
| Starch and sucrose metabolism                 | 23             | 0.000884 |
| Glutathione metabolism                        | 16             | 0.007766 |
| Cyanoamino acid metabolism                    | 10             | 0.012728 |
| MAPK signaling pathway - plant                | 21             | 0.012728 |
| Flavonoid biosynthesis                        | 8              | 0.093888 |
| Tyrosine metabolism                           | 7              | 0.093888 |
| Sesquiterpenoid and triterpenoid biosynthesis | 4              | 0.094416 |
| Biosynthesis of unsaturated fatty acids       | 6              | 0.109163 |
| Betalain biosynthesis                         | 2              | 0.214    |
| Indole alkaloid biosynthesis                  | 1              | 0.298129 |
| Isoquinoline alkaloid biosynthesis            | 4              | 0.298129 |
| Fatty acid metabolism                         | 8              | 0.389815 |
| Monoterpenoid biosynthesis                    | 2              | 0.41668  |
| Glucosinolate biosynthesis                    | 2              | 0.41668  |
| Cutin, suberine and wax biosynthesis          | 4              | 0.421257 |



**Table S6.** The genes involved in “Biosynthesis of secondary metabolites”, “Metabolic pathways”, and “Nitrogen metabolism”.

| Gene id          |                     | B116-CK vs B116-T<br>log2(FC) | B144-CK vs B144-T<br>log2(FC) | Description                   |
|------------------|---------------------|-------------------------------|-------------------------------|-------------------------------|
| <i>POD</i>       | <i>Os06g0521500</i> | 2.145                         | 1.399                         | peroxidase                    |
| <i>POD</i>       | <i>Os01g0963000</i> | 2.873                         | 2.423                         | peroxidase                    |
| <i>POD</i>       | <i>Os12g0111800</i> | 2.366                         | 4.416                         | peroxidase                    |
| <i>POD</i>       | <i>Os06g0546500</i> | -1.028                        | -1.246                        | peroxidase                    |
| <i>POD</i>       | <i>Os06g0522300</i> | 2.497                         | 2.196                         | peroxidase                    |
| <i>POD</i>       | <i>Os03g0235000</i> | 1.742                         | 2.507                         | peroxidase                    |
| <i>POD</i>       | <i>Os10g0109600</i> | 2.780                         | 2.815                         | peroxidase                    |
| <i>POD</i>       | <i>Os08g0113000</i> | 4.867                         | 3.531                         | peroxidase                    |
| <i>OsGA2ox8</i>  | <i>Os05g0560900</i> | -3.723                        | -1.589                        | gibberellin 2beta-dioxygenase |
| <i>OsGA2ox9</i>  | <i>Os02g0630300</i> | -3.891                        | -1.975                        | gibberellin 2beta-dioxygenase |
| <i>OsGA2ox10</i> | <i>Os05g0208550</i> | -3.048                        | -1.397                        | gibberellin 2beta-dioxygenase |
| <i>CAT</i>       | <i>Os02g0115700</i> | 1.410                         | NA                            | catalase                      |
| <i>OsGA2ox7</i>  | <i>Os01g0209700</i> | -2.877                        | NA                            | gibberellin 2beta-dioxygenase |
| <i>OsNR1</i>     | <i>Os08g0468100</i> | 1.636                         | NA                            | Nitrate reductase             |
| <i>OsNR1.2</i>   | <i>Os08g0468700</i> | 2.625                         | NA                            | Nitrate reductase             |
